# Supplementary material for: Biomimetic synthesis of nanostructured SnO particles from Sn6O4(OH)4in aqueous solution of gelatin
Source: Royal Society of Chemistry journal article supplement (doi:10.1039/c4ce01829j), 2014-11-28
Supplement: c4ce01829j1.pdf [file c4ce01829j1.pdf]

# Biomimetic synthesis of nanostructured SnO particles from $\text{Sn}_6\text{O}_4(\text{OH})_4$ in aqueous solution of gelatin

H. Uchiyama\*, S. Nakanishi and H. Kozuka

E-mail address: [h\\_uchi@kansai-u.ac.jp](mailto:h_uchi@kansai-u.ac.jp) (H. Uchiyama).

< Components of gelatin >

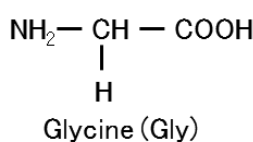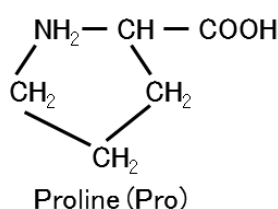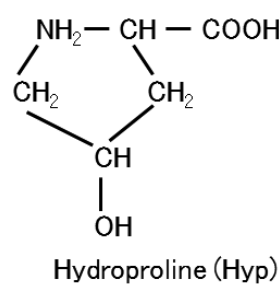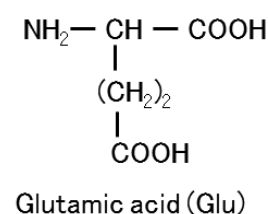

< Structure of gelatin >

e.g.) -Gly-Pro-Hyp-Gly-Glu-Hyp-

**Fig. S1** Typical structures of gelatin.\*

\*Schnepp, Z. Biopolymers as a Flexible Resource for Nanochemistry. *Angew. Chem. Int. Ed.* **2013**, 52, 1096.

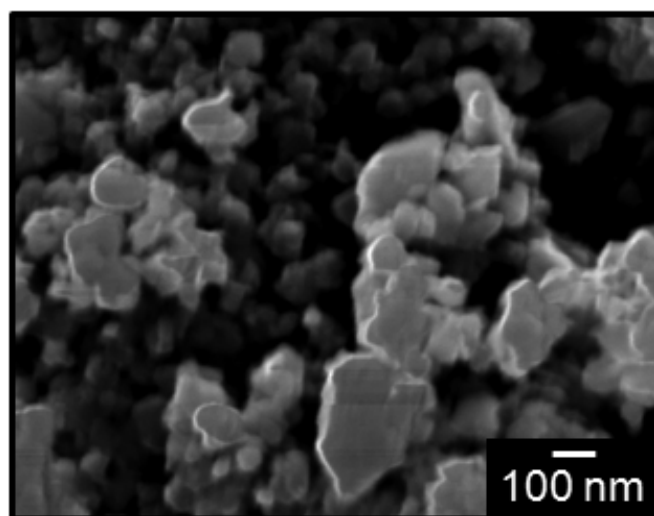

**Fig. S2** SEM images of Sn<sub>6</sub>O<sub>4</sub>(OH)<sub>4</sub> precipitates.
